# Supplementary material
Source: PubMed Central journal article supplement (PMC10318889)
Supplement: sbad024_suppl_supplementary_material.pdf [file sbad024_suppl_supplementary_material.pdf]

**Supplemental Table 1.** Clinical Utility of All Measures Obtained From Meta-analyses and Systematic Reviews

| <i>Instrument</i>                                                                                           | <i>Constructs measured</i>                                                                 | <i># items</i>                     | <i>Time required (in minutes)</i> | <i>Developmental timeframe</i>                |
|-------------------------------------------------------------------------------------------------------------|--------------------------------------------------------------------------------------------|------------------------------------|-----------------------------------|-----------------------------------------------|
| <b>EARLY-LIFE ADVERSITIES</b>                                                                               |                                                                                            |                                    |                                   |                                               |
| <b>Questionnaires</b>                                                                                       |                                                                                            |                                    |                                   |                                               |
| Study-specific questionnaires <sup>1-14</sup>                                                               | NF                                                                                         | 2-7                                | NA                                | Childhood (<18 years old)                     |
| Childhood Trauma Questionnaire (CTQ) <sup>*15-19</sup>                                                      | Physical and emotional neglect/abuse                                                       | 70<br>28 (SF)<br>21 (non-explicit) | 5 (SF) <sup>20</sup>              | Lifetime                                      |
| Hebrew University Database Questionnaires (HUD-Q) <sup>** 21</sup>                                          | Early parental loss                                                                        | NF                                 | NF                                | NF                                            |
| Life Experiences Questionnaire** (not the same as validated LEQ)                                            | Experiences of abuse                                                                       | NF                                 | NF                                | NF                                            |
| Questionnaire, designed for the TRAILS study (TRacking Adolescents' Individual Life Survey) <sup>2,22</sup> | Negative life events                                                                       | 25                                 | NF                                | NF                                            |
| Early Trauma Inventory (EIC) <sup>23</sup>                                                                  | General, physical, emotional, and sexual trauma                                            | 56                                 | NF                                | Lifetime                                      |
| Post-traumatic Stress Diagnostic Scale(PDS) <sup>23</sup>                                                   | Childhood trauma                                                                           | 49                                 | 10-15                             | NF                                            |
| Prenatal Stress Questionnaire (PSQ) <sup>23</sup>                                                           | Prenatal Stress                                                                            | NF                                 | NF                                | Mother's experience during pregnancy          |
| Life Events Checklist (LEC) <sup>24</sup>                                                                   | Negative life events                                                                       | 51                                 | NF                                | Childhood                                     |
| Finkelhor Sexual Abuse Scale <sup>24</sup><br>Abuse Questionnaire <sup>25,26</sup>                          | Sexual abuse<br>Emotional, physical, sexual, and psychological abuse                       | NF<br>4                            | NF<br>NF                          | Childhood<br><16                              |
| Lifetime Trauma and Victimization Scale <sup>27</sup>                                                       | Traumatic experience                                                                       | NF                                 | NF                                | NF                                            |
| Childhood Experience of Care Abuse Questionnaire (CECA.Q)                                                   | Adversity and abuse from care provider                                                     | NF                                 | NF                                | <16                                           |
| Childhood Abuse and Trauma Scale (CATS)                                                                     | Abuse and trauma                                                                           | NF                                 | NF                                | NF                                            |
| <b>Interviews</b>                                                                                           |                                                                                            |                                    |                                   |                                               |
| Schedule for Affective Disorders and Schizophrenia for School-Age Children (K-SADS) <sup>13,28</sup>        | Physical abuse, sexual abuse, domestic violence                                            | Unknown for modified use           | Unknown for modified use          | NF                                            |
| Bullying and Friendship Interview Schedule (BFIS) <sup>12,29,30</sup>                                       | Bullying/social support                                                                    | 12                                 | NF                                | Past 6 months, 8, 10, or 13 years old         |
| Composite International Diagnostic Interview <sup>31-33</sup>                                               | Sexual abuse/Trauma                                                                        | 2 + follow up questions            | Unknown for modified use          | <16 years old                                 |
| Dissociative Disorders Interview Schedule (DDIS) <sup>3</sup>                                               | Physical/sexual abuse                                                                      | 132 (12 in childhood abuse module) | NF                                | Childhood and adolescence                     |
| <b>Medical or public records</b> <sup>14,34-37</sup>                                                        |                                                                                            |                                    |                                   |                                               |
|                                                                                                             | Physical abuse, sexual abuse, parental loss, divorce, use of childhood protective services | NA                                 | NA                                | <16 years old, <24 years old, 14-24 years old |

| <i>Instrument/subscale</i>                                                                                                 | <i>Construct measured</i>                                             | <i># items</i>                  | <i>Time required (in minutes)</i> | <i>Developmental timeframe</i> |
|----------------------------------------------------------------------------------------------------------------------------|-----------------------------------------------------------------------|---------------------------------|-----------------------------------|--------------------------------|
| <b>LIMITED SOCIAL NETWORK</b>                                                                                              |                                                                       |                                 |                                   |                                |
| <b>Questionnaires</b>                                                                                                      |                                                                       |                                 |                                   |                                |
| WHO Quality of Life-Social Relationships* <sup>38-51</sup>                                                                 | Network size                                                          | 100<br>26 (SF)<br>16 (screener) | <40-90                            | Current                        |
| Peer Relations Questionnaire-modified (PRQ) <sup>52</sup>                                                                  | Network size (maximum of 10)                                          | 1                               | NF                                | Current                        |
| <b>Interview</b>                                                                                                           |                                                                       |                                 |                                   |                                |
| Study specific interviews <sup>53,54</sup>                                                                                 | Network size                                                          | NF                              | NF                                | NF                             |
| Social Network Schedule (SNS) <sup>55-57</sup>                                                                             | Network size, subgroups of relationship types                         | 3 + follow up                   | NF                                | Past month                     |
| Social Support and Social Network Interview (modified)* <sup>58</sup>                                                      | Network size, reciprocity                                             | 4 + follow up questions         | NF                                | Current                        |
| Social Network Interview (SNI) <sup>59</sup>                                                                               | Network size, structure, duration                                     | 4 + follow up questions         | 90                                | Past month                     |
| Pattison Psychosocial Kinship Inventory (PPKI) <sup>60</sup>                                                               | Network size                                                          | 5 + follow up questions         | 30-150                            | Current                        |
| Social Relationships Scale (SRS) <sup>61</sup>                                                                             | Network size, positive and negative relationships                     | 6 + follow up                   | NF                                | Current                        |
| Community Adjustment Form(modified) (CAF) <sup>62</sup>                                                                    | Work involvement, living situation, residential mobility              | NF                              | NF                                | NF                             |
| Bizon's Questionnaire (BQ) <sup>63-65</sup>                                                                                | Network size and satisfaction                                         | NF                              | NF                                | NF                             |
| Network Analysis Profile-modified (NAP) <sup>27</sup>                                                                      | Sustenance linkages                                                   | NF                              | NF                                | NF                             |
| Social Network Interview Schedule (SNIS) <sup>59</sup>                                                                     | Social network size, subgroups                                        | NF                              | NF                                | NF                             |
| <b>RACISM</b>                                                                                                              |                                                                       |                                 |                                   |                                |
| <b>Questionnaires</b>                                                                                                      |                                                                       |                                 |                                   |                                |
| Study-specific questionnaires <sup>66-73</sup>                                                                             | Perceived individual/group racial/ethnic discrimination               | 2 <                             | NA                                | Lifetime                       |
| Experience of Discrimination (EOD) <sup>66,74-76</sup>                                                                     | Perceived racial discrimination                                       | 9 + frequency                   | NF                                | Lifetime                       |
| Stephan et al.'s scale (a) <sup>77</sup>                                                                                   | Perceived immigrant discrimination                                    | 48                              | NF                                | Current                        |
| Triana and Garcia's questionnaire <sup>77</sup>                                                                            | Perceived workplace racial discrimination                             | 8                               | NF                                | Current                        |
| Perceived Racism Scale (PRS) <sup>78</sup>                                                                                 | Perceived racial discrimination and coping response                   | 51                              | NF                                | Current                        |
| Everyday Discrimination Scale-Lifetime Discrimination Subscale <sup>66,79,80</sup>                                         | lifetime discrimination, recent discrimination, everyday mistreatment | 9 + follow up questions         | NF                                | Past year and lifetime         |
| Perceived Ethnic Discrimination Questionnaire – Community Version Lifetime Exposure Discrimination (PEDQ-CV) <sup>81</sup> | Perceived ethnic discrimination                                       | 70                              | NF                                | Lifetime                       |

| <i>Instrument/subscale</i>                                  | <i>Constructs measured</i>                                                                                                                                                                                           | <i># items</i> | <i>Time required (in minutes)</i> | <i>Developmental timeframe</i> |
|-------------------------------------------------------------|----------------------------------------------------------------------------------------------------------------------------------------------------------------------------------------------------------------------|----------------|-----------------------------------|--------------------------------|
| <b>URBANICITY AND SOCIOECONOMIC STATUS</b>                  |                                                                                                                                                                                                                      |                |                                   |                                |
| Geographical location of address <sup>82-89</sup>           | Population density of home location                                                                                                                                                                                  | NA             | NA                                | Current                        |
| <b>Census data</b> <sup>85,86,90,91</sup>                   | Material deprivation (assessed via components of census data such as unemployment, poverty, housing quality, etc.)                                                                                                   | NA             | NA                                | Current                        |
| <b>IMMIGRATION</b>                                          |                                                                                                                                                                                                                      |                |                                   |                                |
| <b>Hospital records</b> <sup>92-103</sup>                   | Country of birth/current residence                                                                                                                                                                                   | NA             | NA                                | Birth/current                  |
| <b>Census/national registry</b> <sup>68,94,96,104-127</sup> |                                                                                                                                                                                                                      |                |                                   |                                |
| <b>Self-report</b> <sup>85,92,110,111,128-135</sup>         | Immigration status                                                                                                                                                                                                   | NA             | NA                                | Birth/current                  |
| <b>Interview</b> <sup>94,103,136-138</sup>                  | First- /second- generation status                                                                                                                                                                                    | NA             | NA                                | Birth/current/parents          |
| <b>SOCIAL FRAGMENTATION</b>                                 |                                                                                                                                                                                                                      |                |                                   |                                |
| <b>Census data</b>                                          |                                                                                                                                                                                                                      |                |                                   |                                |
| Social Fragmentation Index (SFI) <sup>139</sup>             | Social fragmentation assessed via combination of homeownership, mobility, marital status, nonfamily households, single-person households, children, immigrants, non-English/Maori speakers, and long-term residents. | NA             | NA                                | Current                        |
| <b>HOMELESSNESS OR HOUSING INSTABILITY</b>                  |                                                                                                                                                                                                                      |                |                                   |                                |
| <b>Interview</b> <sup>140-142</sup>                         | Housing instability                                                                                                                                                                                                  | NA             | NA                                | Current                        |

| <i>Instrument/subscale</i>                                                                  | <i>Constructs measured</i>                             | <i># items</i>          | <i>Time required (in minutes)</i> | <i>Developmental timeframe</i> |
|---------------------------------------------------------------------------------------------|--------------------------------------------------------|-------------------------|-----------------------------------|--------------------------------|
| <b>FOOD INSECURITY</b>                                                                      |                                                        |                         |                                   |                                |
| <b>Interview</b>                                                                            |                                                        |                         |                                   |                                |
| USDA Household Food Security Survey Module <sup>143-160</sup>                               | Food security                                          | 18<br>10<br>6 (SF)<br>1 |                                   | Past 12 months                 |
| <b>Single Question</b> <sup>161-165</sup>                                                   | Food security/had enough food                          | 1                       | NF                                | Current/last month             |
| National Nutrition Survey <sup>166</sup>                                                    | Food security                                          | 1                       | NF                                | Current                        |
| <b>Two-item Screener</b> <sup>167,168</sup>                                                 | Ran out of food/not enough money for food              | 2                       | NF                                | Past 12 months                 |
| <b>Questionnaires</b>                                                                       |                                                        |                         |                                   |                                |
| Community Childhood Hunger Identification Project in Suffolk County <sup>169</sup>          | Hunger and difficulty obtaining food                   | NF                      | NF                                | NF                             |
| British Columbia Nutrition Survey <sup>170</sup>                                            | Worry about food access and compressed diet            | 2                       | NF                                | NF                             |
| Radimer/Cornell Hunger & Food Insecurity Questionnaire                                      | Food anxiety, food quality and food quantity           | 9                       | NF                                | Current                        |
| Household Food Insecurity Access Scale (HFIAS) <sup>171</sup>                               | Food insecure household                                | 9                       | NF                                | Current                        |
| 3-item survey <sup>172</sup>                                                                | Lack of food/use of charitable services to obtain food | 3                       | NF                                | Past 12 months                 |
| Unnamed survey <sup>173</sup>                                                               | Food security                                          | NF                      | NF                                | NF                             |
| Food Insecurity Experience Scale Survey                                                     | Food security                                          | 8                       | NF                                | NF                             |
| Module for Individuals (FIES SM-I) <sup>174</sup>                                           |                                                        |                         |                                   |                                |
| National Health Interview Survey <sup>175</sup>                                             | Food security                                          | NF                      | NF                                | NF                             |
| <b>Proxy</b>                                                                                |                                                        |                         |                                   |                                |
| Demographics, height, weight, iodine deficiency, low birthweight <sup>176-180</sup>         | Nutritional availability                               | NA                      | NA                                | NA                             |
| Access to 3 meals per day <sup>181</sup>                                                    | Food availability                                      | 1                       | NF                                | NF                             |
| Nutrition, iodine deficiency, iron deficiency, and other nutritional factors <sup>180</sup> | Biological lack of food                                | NA                      | NA                                | NA                             |
| Poverty <sup>176,177,179</sup>                                                              | Lack of money for food                                 | NF                      | NF                                | NF                             |
| <b>INCARCERATION</b>                                                                        |                                                        |                         |                                   |                                |
| <b>Sampling method</b> <sup>182-186</sup>                                                   | Incarceration                                          | NA                      | NA                                | Current                        |
| <b>Public records</b> <sup>185,186</sup>                                                    | History of incarceration                               | NA                      | NA                                | Lifetime                       |

**Note:**

\* tested in samples other than healthy controls,

\*\* developed for specific study,

a = adapted,

aka = also known as,

avg. = average,

hr. = hour,

m = modified,

min. = minutes,

NA = not applicable,

NF = not found,

SF = short form

SMI = severe mental illness,

WHO = World Health Organization.

### Supplemental Table 1 References

1. Giblin S, Clare L, Livingston G, Howard R. Psychosocial correlates of late-onset psychosis: life experiences, cognitive schemas, and attitudes to ageing. *International Journal of Geriatric Psychiatry*. 2004;19(7):611-623. doi:10.1002/gps.1129
2. Bartels-Velthuis AA, van de Willige G, Jenner JA, Wiersma D, van Os J. Auditory hallucinations in childhood: associations with adversity and delusional ideation. *Psychol Med*. 2012;42(3):583-593. doi:10.1017/S0033291711001590
3. Ross CA, Joshi S. Schneiderian Symptoms and Childhood Trauma in the General Population. *Comprehensive Psychiatry*. 1992;33(4):269-273.
4. Kim HS, Kim HS. Incestuous Experience Among Korean Adolescents: Prevalence, Family Problems, Perceived Family Dynamics, and Psychological Characteristics. *Public Health Nurs*. 2005;22(6):472-482. doi:10.1111/j.0737-1209.2005.220604.x
5. Shevlin M, Dorahy MJ, Adamson G. Trauma and Psychosis: An Analysis of the National Comorbidity Survey. *AJP*. 2007;164(1):166-169. doi:10.1176/ajp.2007.164.1.166
6. Shevlin M, Houston JE, Dorahy MJ, Adamson G. Cumulative Traumas and Psychosis: an Analysis of the National Comorbidity Survey and the British Psychiatric Morbidity Survey. *Schizophrenia Bulletin*. 2007;34(1):193-199. doi:10.1093/schbul/sbm069
7. Nishida A, Tanii H, Nishimura Y, et al. Associations between psychotic-like experiences and mental health status and other psychopathologies among Japanese early teens. *Schizophrenia Research*. 2008;99(1-3):125-133. doi:10.1016/j.schres.2007.11.038
8. Shevlin M, Murphy J, Read J, Mallett J, Adamson G, Houston JE. Childhood adversity and hallucinations: a community-based study using the National Comorbidity Survey Replication. *Soc Psychiatry Psychiatr Epidemiol*. 2011;46(12):1203-1210. doi:10.1007/s00127-010-0296-x
9. van Nierop M, van Os J, Gunther N, et al. Phenotypically Continuous With Clinical Psychosis, Discontinuous in Need for Care: Evidence for an Extended Psychosis Phenotype. *Schizophrenia Bulletin*. 2012;38(2):231-238. doi:10.1093/schbul/sbr129
10. Boden JM, van Stockum S, Horwood LJ, Fergusson DM. Bullying victimization in adolescence and psychotic symptomatology in adulthood: evidence from a 35-year study. *Psychol Med*. 2016;46(6):1311-1320. doi:10.1017/S0033291715002962
11. De Loore E, Drukker M, Gunther N, et al. Childhood negative experiences and subclinical psychosis in adolescence: a longitudinal general population study. *Early Interven Psychiatry*. 2007;1(2):201-207. doi:10.1111/j.1751-7893.2007.00027.x
12. Fisher HL, Schreier A, Zammit S, et al. Pathways Between Childhood Victimization and Psychosis-like Symptoms in the ALSPAC Birth Cohort. *Schizophrenia Bulletin*. 2013;39(5):1045-1055. doi:10.1093/schbul/sbs088
13. Kelleher I, Harley M, Lynch F, Arseneault L, Fitzpatrick C, Cannon M. Associations between childhood trauma, bullying and psychotic symptoms among a school-based adolescent sample. *Br J Psychiatry*. 2008;193(5):378-382. doi:10.1192/bjp.bp.108.049536

14. Reiff M, Castille DM, Muenzenmaier K, Link B. Childhood abuse and the content of adult psychotic symptoms. *Psychological Trauma: Theory, Research, Practice, and Policy*. 2012;4(4):356-369. doi:10.1037/a0024203
15. Bendall S, Hulbert CA, Alvarez-Jimenez M, Allott K, McGorry PD, Jackson HJ. Testing a Model of the Relationship Between Childhood Sexual Abuse and Psychosis in a First-Episode Psychosis Group: The Role of Hallucinations and Delusions, Posttraumatic Intrusions, and Selective Attention. *Journal of Nervous & Mental Disease*. 2013;201(11):941-947. doi:10.1097/NMD.0000000000000033
16. Daalman K, Diederens KMJ, Derks EM, van Lutterveld R, Kahn RS, Sommer IEC. Childhood trauma and auditory verbal hallucinations. *Psychol Med*. 2012;42(12):2475-2484. doi:10.1017/S0033291712000761
17. Heins M, Simons C, Lataster T, et al. Childhood Trauma and Psychosis: A Case-Control and Case-Sibling Comparison Across Different Levels of Genetic Liability, Psychopathology, and Type of Trauma. *AJP*. 2011;168(12):1286-1294. doi:10.1176/appi.ajp.2011.10101531
18. Perona-Garcelán S, Carrascoso- López F, García-Montes JM, et al. Dissociative experiences as mediators between childhood trauma and auditory hallucinations. *Journal of Traumatic Stress*. 2012;25(3):323-329. doi:10.1002/jts.21693
19. Kramer IMA, Simons CJP, Myin-Germeys I, et al. Evidence that genes for depression impact on the pathway from trauma to psychotic-like symptoms by occasioning emotional dysregulation. *Psychol Med*. 2012;42(2):283-294. doi:10.1017/S0033291711001474
20. Bernstein DP, Stein JA, Newcomb MD, et al. Development and validation of a brief screening version of the Childhood Trauma Questionnaire. *Child Abuse & Neglect*. 2003;27(2):169-190. doi:10.1016/S0145-2134(02)00541-0
21. Agid O, Shapira B, Zislin J, et al. Environment and Vulnerability to Major Psychiatric Illness: A Case Control Study of Early Parental Loss in Major Depression, Bipolar Disorder, and Schizophrenia. *Molecular Psychiatry*. 1999;4:163-172.
22. Wigman JTW, Winkel R van, Raaijmakers Q a. W, et al. Evidence for a persistent, environment-dependent and deteriorating subtype of subclinical psychotic experiences: a 6-year longitudinal general population study. *Psychological Medicine*. 2011;41(11):2317-2329. doi:10.1017/S0033291711000304
23. Weber K, Rockstroh B, Borgelt J, et al. Stress load during childhood affects psychopathology in psychiatric patients. *BMC Psychiatry*. 2008;8(1):63. doi:10.1186/1471-244X-8-63
24. Fennig S, Horesh N, Aloni D, Apter A, Weizman A, Fennig S. Life events and suicidality in adolescents with schizophrenia. *Europ Child & Adolescent Psych*. 2005;14(8):454-460. doi:10.1007/s00787-005-0498-z
25. Janssen I, Krabbendam L, Bak M, et al. Childhood abuse as a risk factor for psychotic experiences. *Acta Psychiatrica Scandinavica*. 2004;109(1):38-45. doi:10.1046/j.0001-690X.2003.00217.x

26. Rubino IA, Nanni RC, Pozzi DM, Siracusano A. Early Adverse Experiences in Schizophrenia and Unipolar Depression. *The Journal of Nervous and Mental Disease*. 2009;197(1):65-68. doi:10.1097/NMD.0b013e3181925342
27. Cohen CI, Abdallah CG, Diwan S. Suicide attempts and associated factors in older adults with schizophrenia. *Schizophrenia Research*. 2010;119(1-3):253-257. doi:10.1016/j.schres.2010.03.010
28. Harley M, Kelleher I, Clarke M, et al. Cannabis use and childhood trauma interact additively to increase the risk of psychotic symptoms in adolescence. *Psychological Medicine*. 2010;40(10):1627-1634. doi:10.1017/S0033291709991966
29. Schreier A, Wolke D, Thomas K, et al. Prospective Study of Peer Victimization in Childhood and Psychotic Symptoms in a Nonclinical Population at Age 12 Years. *Archives of General Psychiatry*. 2009;66(5):527-536. doi:10.1001/archgenpsychiatry.2009.23
30. Wolke D, Lereya ST, Fisher HL, Lewis G, Zammit S. Bullying in elementary school and psychotic experiences at 18 years: a longitudinal, population-based cohort study. *Psychol Med*. 2014;44(10):2199-2211. doi:10.1017/S0033291713002912
31. Houston JE, Murphy J, Adamson G, Stringer M, Shevlin M. Childhood Sexual Abuse, Early Cannabis Use, and Psychosis: Testing an Interaction Model Based on the National Comorbidity Survey. *Schizophrenia Bulletin*. 2007;34(3):580-585. doi:10.1093/schbul/sbm127
32. Kuepper R, van Os J, Lieb R, Wittchen HU, Henquet C. Do cannabis and urbanicity co-participate in causing psychosis? Evidence from a 10-year follow-up cohort study. *Psychol Med*. 2011;41(10):2121-2129. doi:10.1017/S0033291711000511
33. Spauwen J, Krabbendam L, Lieb R, Wittchen HU, Van Os J. Impact of psychological trauma on the development of psychotic symptoms: relationship with psychosis proneness. *Br J Psychiatry*. 2006;188(6):527-533. doi:10.1192/bjp.bp.105.011346
34. Cutajar MC, Mullen PE, Ogloff JRP, Thomas SD, Wells DL, Spataro J. Psychopathology in a large cohort of sexually abused children followed up to 43 years. *Child Abuse & Neglect*. 2010;34(11):813-822. doi:10.1016/j.chiabu.2010.04.004
35. Elklit A, Shevlin M. Female Sexual Victimization Predicts Psychosis: A Case-Control Study Based on the Danish Registry System. *Schizophrenia Bulletin*. 2011;37(6):1305-1310. doi:10.1093/schbul/sbq048
36. Lee WE, Kwok CHT, Hunter ECM, Richards M, David AS. Prevalence and childhood antecedents of depersonalization syndrome in a UK birth cohort. *Soc Psychiatry Psychiatr Epidemiol*. 2012;47(2):253-261. doi:10.1007/s00127-010-0327-7
37. van der Ven E, Dalman C, Wicks S, et al. Testing Ødegaard's selective migration hypothesis: a longitudinal cohort study of risk factors for non-affective psychotic disorders among prospective emigrants. *Psychol Med*. 2015;45(4):727-734. doi:10.1017/S0033291714001780
38. WHO. WHOQOL User Manual. Published online rev. 2021 1998. file:///C:/Users/etkra/Downloads/WHO\_HIS\_HSI\_Rev.2012.03\_eng.pdf

39. Gomes E, Bastos T, Probst M, Ribeiro JC, Silva G, Corredeira R. Quality of life and physical activity levels in outpatients with schizophrenia. *Braz J Psychiatry*. 2016;38:157-160. doi:10.1590/1516-4446-2015-1709
40. Sum MY, Ho NF, Sim K. Cross diagnostic comparisons of quality of life deficits in remitted and unremitted patients with schizophrenia and bipolar disorder. *Schizophrenia Research*. 2015;168(1):191-196. doi:10.1016/j.schres.2015.08.030
41. Afonso P, Figueira ML, Paiva T. Sleep–wake patterns in schizophrenia patients compared to healthy controls. *The World Journal of Biological Psychiatry*. 2014;15(7):517-524. doi:10.3109/15622975.2012.756987
42. Kerling A, Tegtbur U, Ziegenbein M, Grams L, Heinze DR, Sieberer M. Exercise Capacity and Quality of Life in Patients with Schizophrenia. *Psychiatr Q*. 2013;84(4):417-427. doi:10.1007/s11126-013-9256-4
43. Maat A, Fett AK, Derks E. Social cognition and quality of life in schizophrenia. *Schizophrenia Research*. 2012;137(1):212-218. doi:10.1016/j.schres.2012.02.017
44. Lucas-Carrasco R. The WHO quality of life (WHOQOL) questionnaire: Spanish development and validation studies. *Qual Life Res*. 2012;21(1):161-165. doi:10.1007/s11136-011-9926-3
45. Vancampfort D, Probst M, Scheewe T, et al. Lack of physical activity during leisure time contributes to an impaired health related quality of life in patients with schizophrenia. *Schizophrenia Research*. 2011;129(2):122-127. doi:10.1016/j.schres.2011.03.018
46. Woon PS, Chia MY, Chan WY, Sim K. Neurocognitive, clinical and functional correlates of subjective quality of life in Asian outpatients with schizophrenia. *Progress in Neuro-Psychopharmacology and Biological Psychiatry*. 2010;34(3):463-468. doi:10.1016/j.pnpbp.2010.01.014
47. Ulaş H, Polat S, Akdede BB, Alptekin K. Impact of panic attacks on quality of life among patients with schizophrenia. *Progress in Neuro-Psychopharmacology and Biological Psychiatry*. 2010;34(7):1300-1305. doi:10.1016/j.pnpbp.2010.07.014
48. Picardi A, Rucci P, de Girolamo G, Santone G, Borsetti G, Morosini P. The quality of life of the mentally ill living in residential facilities. *Eur Arch Psychiatry Clin Neurosci*. 2006;256(6):372-381. doi:10.1007/s00406-006-0647-5
49. Akvardar Y, Akdede BB, Özerdem A, Eser E, Topkaya Ş, Alptekin K. Assessment of quality of life with the WHOQOL-BREF in a group of Turkish psychiatric patients compared with diabetic and healthy subjects. *Psychiatry and Clinical Neurosciences*. 2006;60(6):693-699. doi:10.1111/j.1440-1819.2006.01584.x
50. Awadalla AW, Ohaeri JU, Salih AA, Tawfiq AM. Subjective quality of life of family caregivers of community living Sudanese psychiatric patients. *Soc Psychiat Epidemiol*. 2005;40(9):755-763. doi:10.1007/s00127-005-0947-x
51. Alptekin K, Akvardar Y, Akdede BBK, et al. Is quality of life associated with cognitive impairment in schizophrenia? *Progress in Neuro-Psychopharmacology and Biological Psychiatry*. 2005;29(2):239-244. doi:10.1016/j.pnpbp.2004.11.006



52. Allison G, Harrop C, Ellett L. Perception of peer group rank of individuals with early psychosis. *British Journal of Clinical Psychology*. 2013;52(1):1-11. doi:10.1111/j.2044-8260.2012.02041.x
53. Dixon L, Goldberg R, Lehman A, McNary S. The Impact of Health Status on Work, Symptoms, and Functional Outcomes in Severe Mental Illness. *Journal of Nervous & Mental Disease*. 2001;189(1):17-22.
54. Horan W, Subotnik K, Snyder K, Nuechterlein K. Do Recent-Onset Schizophrenia Patients Experience a "Social Network Crisis"? *Psychiatry*. 2006;69:115-129. doi:10.1521/psyc.2006.69.2.115
55. Becker T, Leese M, Clarkson P, et al. Links between social networks and quality of life: an epidemiologically representative study of psychotic patients in South London. *Social Psychiatry and Psychiatric Epidemiology*. 1998;33(7):299-304. doi:10.1007/s001270050058
56. Howard L, Leese M, Thornicroft G. Social networks and functional status in patients with psychosis. *Acta Psychiatrica Scandinavica*. 2000;102(5):376-385. doi:10.1034/j.1600-0447.2000.102005376.x
57. Thorup A, Petersen L, Jeppesen P, et al. Social network among young adults with first-episode schizophrenia spectrum disorders: Results from the Danish OPUS trial. *Soc Psychiatr Epidemiol*. 2006;41(10):761-770. doi:10.1007/s00127-006-0098-3
58. Goldberg RW, Rollins AL, Lehman AF. Social network correlates among people with psychiatric disabilities. *Psychiatric Rehabilitation Journal*. 2003;26(4):393-402. doi:10.2975/26.2003.393.402
59. Cresswell CM, Kuipers L, Power MJ. Social networks and support in long-term psychiatric patients. *Psychol Med*. 1992;22(4):1019-1026. doi:10.1017/s0033291700038587
60. Hamilton NG, Ponzoha CA, Cutler DL, Weigel RM. Social Networks and Negative Versus Positive Symptoms of Schizophrenia. *Schizophrenia Bulletin*. 1989;15(4):625-633. doi:10.1093/schbul/15.4.625
61. Macdonald EM, Jackson HJ, Hayes RL, Baglioni AJ, Madden C. Social skill as a determinant of social networks and perceived social support in schizophrenia. *Schizophrenia Research*. 1998;29(3):275-286. doi:10.1016/S0920-9964(97)00096-0
62. Angell B, Test MA. The Relationship of Clinical Factors and Environmental Opportunities to Social Functioning in Young Adults With Schizophrenia. *Schizophrenia Bulletin*. 2002;28(2):259-271. doi:10.1093/oxfordjournals.schbul.a006936
63. Cechnicki A, Wojciechowska A. Correlations between parameters of the social network and treatment outcomes of people suffering from schizophrenia seven years after the first hospitalization. *Archives of Psychiatry and Psychotherapy*.:10.
64. Cechnicki A, Wojciechowska A, Valdez M. The social network and the quality of life of people suffering from schizophrenia seven years after the first hospitalisation. *Archives of Psychiatry and Psychotherapy*.:8.

65. Wojtalik JA, Eack SM, Pollock BG, Keshavan MS. Prefrontal gray matter morphology mediates the association between serum anticholinergic activity and cognitive functioning in early course schizophrenia. *Psychiatry Research: Neuroimaging*. 2012;204(2):61-67. doi:10.1016/j.pscychresns.2012.04.014
66. Bardol O, Grot S, Oh H, et al. Perceived ethnic discrimination as a risk factor for psychotic symptoms: a systematic review and meta-analysis. *Psychological Medicine*. 2020;50(7):1077-1089. doi:10.1017/S003329172000094X
67. Karlsen S, Nazroo JY, McKENZIE K, Bhui K, Weich S. Racism, psychosis and common mental disorder among ethnic minority groups in England. *Psychological Medicine*. 2005;35(12):1795-1803. doi:10.1017/S0033291705005830
68. Veling W, Selten JP, Veen N, Laan W, Blom JD, Hoek HW. Incidence of schizophrenia among ethnic minorities in the Netherlands: A four-year first-contact study. *Schizophrenia Research*. 2006;86(1-3):189-193. doi:10.1016/j.schres.2006.06.010
69. Veling W, Hoek HW, Mackenbach JP. Perceived discrimination and the risk of schizophrenia in ethnic minorities. *Soc Psychiat Epidemiol*. 2008;43(12):953-959. doi:10.1007/s00127-008-0381-6
70. Bécares L, Nazroo J, Stafford M. The buffering effects of ethnic density on experienced racism and health. *Health & Place*. 2009;15(3):700-708. doi:10.1016/j.healthplace.2008.10.008
71. Chakraborty AT, McKenzie KJ, Hajat S, Stansfeld SA. Racism, mental illness and social support in the UK. *Soc Psychiat Epidemiol*. 2010;45(12):1115-1124. doi:10.1007/s00127-009-0156-8
72. Berg M, Wendt S. *Racism in the Modern World: Historical Perspectives on Cultural Transfer and Adaptation*. Berghahn Books; 2011.
73. el Bouhaddani S, van Domburgh L, Schaefer B, Doreleijers TAH, Veling W. Psychotic experiences among ethnic majority and minority adolescents and the role of discrimination and ethnic identity. *Soc Psychiatry Psychiatr Epidemiol*. 2019;54(3):343-353. doi:10.1007/s00127-019-01658-1
74. Anglin DM, Lui F, Espinosa A, Tikhonov A, Ellman L. Ethnic identity, racial discrimination and attenuated psychotic symptoms in an urban population of emerging adults. *Early Intervention in Psychiatry*. 2018;12(3):380-390. doi:10.1111/eip.12314
75. Anglin DM, Greenspoon M, Lighty Q, Ellman LM. Race-based rejection sensitivity partially accounts for the relationship between racial discrimination and distressing attenuated positive psychotic symptoms. *Early Intervention in Psychiatry*. 2016;10(5):411-418. doi:10.1111/eip.12184
76. Anglin DM, Lighty Q, Greenspoon M, Ellman LM. Racial discrimination is associated with distressing subthreshold positive psychotic symptoms among US urban ethnic minority young adults. *Soc Psychiatry Psychiatr Epidemiol*. 2014;49(10):1545-1555. doi:10.1007/s00127-014-0870-8

77. Kong DT. Ethnic minorities' paranoia and self-preservative work behaviors in response to perceived ethnic discrimination, with collective self-esteem as a buffer. *Journal of Occupational Health Psychology*. 2016;21(3):334-351. doi:10.1037/ocp0000013
78. Combs DR, Penn DL, Cassisi J, et al. Perceived Racism as a Predictor of Paranoia Among African Americans. *Journal of Black Psychology*. 2006;32(1):87-104. doi:10.1177/0095798405283175
79. Oh H, Cogburn CD, Anglin D, Lukens E, DeVlyder J. Major discriminatory events and risk for psychotic experiences among Black Americans. *American Journal of Orthopsychiatry*. 2016;86(3):277-285. doi:10.1037/ort0000158
80. Williams DR, Anderson NB, Yu Y, Jackson JS. Racial Differences in Physical and Mental Health. *Journal of Health Psychology*. 1997;2(3):335-351.
81. Shaikh M, Ellett L, Dutt A, et al. Perceived ethnic discrimination and persecutory paranoia in individuals at ultra-high risk for psychosis. *Psychiatry Research*. 2016;241:309-314. doi:10.1016/j.psychres.2016.05.006
82. Allardyce J, Boydell J, Van Os J, et al. Comparison of the incidence of schizophrenia in rural Dumfries and Galloway and urban Camberwell. *Br J Psychiatry*. 2001;179(4):335-339. doi:10.1192/bjp.179.4.335
83. Chien IC, Chou YJ, Lin CH, Bih SH, Chou P, Chang HJ. Prevalence and incidence of schizophrenia among national health insurance enrollees in Taiwan, 1996-2001. *Psychiatry and Clinical Neurosciences*. 2004;58(6):611-618. doi:10.1111/j.1440-1819.2004.01311.x
84. Kirkbride JB, Fearon P, Morgan C, et al. Heterogeneity in Incidence Rates of Schizophrenia and Other Psychotic Syndromes. *Archives of General Psychiatry*. 2006;63:250-258.
85. Lasalvia A, Bonetto C, Tosato S, et al. First-contact incidence of psychosis in north-eastern Italy: influence of age, gender, immigration and socioeconomic deprivation. *Br J Psychiatry*. 2014;205(2):127-134. doi:10.1192/bjp.bp.113.134445
86. Omer S, Kirkbride JB, Pringle DG, Russell V, O'Callaghan E, Waddington JL. Neighbourhood-level socio-environmental factors and incidence of first episode psychosis by place at onset in rural Ireland: The Cavan–Monaghan First Episode Psychosis Study [CAMFEPS]. *Schizophrenia Research*. 2014;152(1):152-157. doi:10.1016/j.schres.2013.11.019
87. Pelayo-Terán JM, Pérez-Iglesias R, Ramírez-Bonilla M, et al. Epidemiological factors associated with treated incidence of first-episode non-affective psychosis in Cantabria: Insights from the Clinical Programme on Early Phases of Psychosis. *Early Intervention in Psychiatry*. 2008;2(3):178-187. doi:10.1111/j.1751-7893.2008.00074.x
88. Sundquist K, Frank G, Sundquist J. Urbanisation and incidence of psychosis and depression: Follow-up study of 4.4 million women and men in Sweden. *Br J Psychiatry*. 2004;184(4):293-298. doi:10.1192/bjp.184.4.293
89. Szöke A, Charpeaud T, Galliot AM, et al. Rural-urban variation in incidence of psychosis in France: A prospective epidemiologic study in two contrasted catchment areas. *BMC Psychiatry*. 2014;14. doi:10.1186/1471-244X-14-78

90. Boydell J, Os J van, McKenzie K, et al. Incidence of schizophrenia in ethnic minorities in London: ecological study into interactions with environment. *BMJ*. 2001;323(7325):1336. doi:10.1136/bmj.323.7325.1336
91. Veling W, Susser E, Selten JP, Hoek HW. Social disorganization of neighborhoods and incidence of psychotic disorders: a 7-year first-contact incidence study. *Psychological Medicine*. 2015;45(9):1789-1798. doi:10.1017/S0033291714002682
92. Bebbington PE, Hurry J, Tennant C. Psychiatric disorders in selected immigrant groups in Camberwell. *Soc Psychiatry*. 1981;16(1):43-51. doi:10.1007/BF00578068
93. Fossion P, Ledoux Y, Valente F, et al. Psychiatric disorders and social characteristics among second-generation Moroccan migrants in Belgium: An age-and gender-controlled study conducted in a psychiatric emergency department. *European Psychiatry*. 2002;17(8):443-450. doi:10.1016/S0924-9338(02)00707-1
94. Harrison G, Glazebrook C, Brewin J, et al. Increased incidence of psychotic disorders in migrants from the Caribbean to the United Kingdom. *Psychol Med*. 1997;27(4):799-806. doi:10.1017/S0033291796004643
95. Hitch PJ, Clegg P. MODES OF REFERRAL OF OVERSEAS IMMIGRANT AND NATIVE-BORN FIRST ADMISSIONS TO PSYCHIATRIC HOSPITAL. *Social Science & Medicine*. 1980;14(4):369-374. doi:10.1016/S0271-7123(80)90423-X
96. Hogerzeil SJ, van Hemert AM, Veling W, Hoek HW. Incidence of schizophrenia among migrants in the Netherlands: a direct comparison of first contact longitudinal register approaches. *Soc Psychiatry Psychiatr Epidemiol*. 2017;52(2):147-154. doi:10.1007/s00127-016-1310-8
97. Mitter PR, Krishnan S, Bell P, Stewart R, Howard RJ. The effect of ethnicity and gender on first-contact rates for schizophrenia-like psychosis in Bangladeshi, Black and White elders in Tower Hamlets, London. *International Journal of Geriatric Psychiatry*. 2004;19(3):286-290. doi:10.1002/gps.1084
98. Rwegellera GG. Psychiatric morbidity among West Africans and West Indians living in London. *Psychol Med*. 1977;7(2):317-329. doi:10.1017/s0033291700029421
99. Selten JP, Slaets JPJ, Kahn RS. Schizophrenia in Surinamese and Dutch Antillean immigrants to The Netherlands: evidence of an increased incidence. *Psychol Med*. 1997;27(4):807-811. doi:10.1017/S0033291797005199
100. Smith GN, Boydell J, Murray RM, et al. The incidence of schizophrenia in European immigrants to Canada. *Schizophrenia Research*. 2006;87(1-3):205-211. doi:10.1016/j.schres.2006.06.024
101. Thomas CS, Stone K, Osborn M, Thomas PF, Fisher M. Psychiatric Morbidity and Compulsory Admission Among UK-Born Europeans, Afro-Caribbeans and Asians in Central Manchester. *Br J Psychiatry*. 1993;163(1):91-99. doi:10.1192/bjp.163.1.91
102. Tortelli A, Morgan C, Szoke A, et al. Different rates of first admissions for psychosis in migrant groups in Paris. *Soc Psychiatry Psychiatr Epidemiol*. 2014;49(7):1103-1109. doi:10.1007/s00127-013-0795-7

103. Van Os J, Castle DJ, Takei N, Der G, Murray RM. Psychotic illness in ethnic minorities: clarification from the 1991 census. *Psychol Med*. 1996;26(1):203-208. doi:10.1017/S0033291700033845
104. Anderson KK, Cheng J, Susser E, McKenzie KJ, Kurdyak P. Incidence of psychotic disorders among first-generation immigrants and refugees in Ontario. *CMAJ*. 2015;187(9):E279-E286. doi:10.1503/cmaj.141420
105. Bansal N, Bhopal R, Netto G, Lyons D, Steiner MFC, Sashidharan SP. Disparate patterns of hospitalisation reflect unmet needs and persistent ethnic inequalities in mental health care: the Scottish health and ethnicity linkage study. *Ethnicity & Health*. 2014;19(2):217-239. doi:10.1080/13557858.2013.814764
106. Bhugra D, Hilwig M, Hossein B, et al. First-Contact Incidence Rates of Schizophrenia in Trinidad and One-Year Follow-up. *Br J Psychiatry*. 1996;169(5):587-592. doi:10.1192/bjp.169.5.587
107. Cantor-Graae E, Pedersen CB, Mcneil TF, Mortensen PB. Migration as a risk factor for schizophrenia: A Danish population-based cohort study. *Br J Psychiatry*. 2003;182(2):117-122. doi:10.1192/bjp.182.2.117
108. Cantor-Graae E, Zolkowska K, McNEIL TF. Increased risk of psychotic disorder among immigrants in Malmö: a 3-year first-contact study. *Psychol Med*. 2005;35(8):1155-1163. doi:10.1017/S0033291705004721
109. Cantor-Graae E, Pedersen CB. Risk for schizophrenia in intercountry adoptees: a Danish population-based cohort study. *Journal of Child Psychology and Psychiatry*. 2007;48(11):1053-1060. doi:10.1111/j.1469-7610.2007.01788.x
110. Cheng F, Kirkbride JB, Lennox BR, et al. Administrative incidence of psychosis assessed in an early intervention service in England: first epidemiological evidence from a diverse, rural and urban setting. *Psychol Med*. 2011;41(5):949-958. doi:10.1017/S0033291710002461
111. Dean G, Walsh D, Downing H, Shelley E. First Admissions of Native-Born and Immigrants to Psychiatric Hospitals in South-East England 1976. *Br J Psychiatry*. 1981;139(6):506-512. doi:10.1192/bjp.139.6.506
112. Dykxhoorn J, Hollander AC, Lewis G, Magnusson C, Dalman C, Kirkbride JB. Risk of schizophrenia, schizoaffective, and bipolar disorders by migrant status, region of origin, and age-at-migration: a national cohort study of 1.8 million people. *Psychol Med*. 2019;49(14):2354-2363. doi:10.1017/S0033291718003227
113. Hollander AC, Dal H, Lewis G, Magnusson C, Kirkbride JB, Dalman C. Refugee migration and risk of schizophrenia and other non-affective psychoses: cohort study of 1.3 million people in Sweden. *BMJ*. Published online March 15, 2016:i1030. doi:10.1136/bmj.i1030
114. Krupinski J, Cochrane R. Migration and mental health — a comparative study. *Journal of Intercultural Studies*. 1980;1(1):49-57. doi:10.1080/07256868.1980.9963140
115. Manhica H, Hollander AC, Almquist YB, Rostila M, Hjern A. Origin and schizophrenia in young refugees and inter-country adoptees from Latin America and East Africa in Sweden: a

comparative study. *BJPsych*  
doi:10.1192/bjpo.bp.115.002048

*open*. 2016;2(1):6-9.

116. Markkula N, Lehti V, Gissler M, Suvisaari J. Incidence and prevalence of mental disorders among immigrants and native Finns: a register-based study. *Soc Psychiatry Psychiatr Epidemiol*. 2017;52(12):1523-1540. doi:10.1007/s00127-017-1432-7

117. Mortensen PB, Cantor-Graae E, McNEIL TF. Increased rates of schizophrenia among immigrants: some methodological concerns raised by Danish findings. *Psychol Med*. 1997;27(4):813-820. doi:10.1017/S0033291797004741

118. Mulè A, Sideli L, Capuccio V, et al. Low incidence of psychosis in Italy: confirmation from the first epidemiological study in Sicily. *Soc Psychiatry Psychiatr Epidemiol*. 2017;52(2):155-162. doi:10.1007/s00127-016-1322-4

119. Schofield P, Thygesen M, Das-Munshi J, et al. Neighbourhood ethnic density and psychosis — Is there a difference according to generation? *Schizophrenia Research*. 2018;195:501-505. doi:10.1016/j.schres.2017.09.029

120. Selten JP, Sijben N. First admission rates for schizophrenia in immigrants to the Netherlands: The Dutch national register. *Soc Psychiatry Psychiatr Epidemiol*. 1994;29(2):71-77. doi:10.1007/BF00805625

121. Sendra-Gutiérrez JM, de Francisco Beltrán P, Iribarren M, Vargas Aragón ML. Outpatient psychiatric care in the immigrant population of Segovia (2001–2008): Descriptive study. *Revista de Psiquiatría y Salud Mental (English Edition)*. 2012;5(3):173-182. doi:10.1016/j.rpsmen.2011.05.004

122. Tarricone I, Mimmi S, Paparelli A, et al. First-episode psychosis at the West Bologna Community Mental Health Centre: results of an 8-year prospective study. *Psychol Med*. 2012;42(11):2255-2264. doi:10.1017/S0033291712000335

123. Werbeloff N, Levine SZ, Rabinowitz J. Elaboration on the association between immigration and schizophrenia: a population-based national study disaggregating annual trends, country of origin and sex over 15 years. *Soc Psychiatry Psychiatr Epidemiol*. 2012;47(2):303-311. doi:10.1007/s00127-011-0342-3

124. Westman J, Johansson LM, Sundquist K. Country of birth and hospital admission rates for mental disorders: a cohort study of 4.5 million men and women in Sweden: Sources of support: This work was supported by the Swedish Research Council (Grant No. K2004-21X-11651-09A), the National Institutes of Health (Grant No. R01-H271084-1), and the Knut and Alice Wallenberg Foundation. *European Psychiatry*. 2006;21(5):307-314. doi:10.1016/j.eurpsy.2006.02.001

125. Zandi T, Havenaar JM, Smits M, et al. First contact incidence of psychotic disorders among native Dutch and Moroccan immigrants in the Netherlands: Influence of diagnostic bias. *Schizophrenia Research*. 2010;119(1-3):27-33. doi:10.1016/j.schres.2010.02.1059

126. Leão TS, Sundquist J, Frank G, Johansson LM, Johansson SE, Sundquist K. Incidence of Schizophrenia or Other Psychoses in First- and Second-Generation Immigrants: A National Cohort Study. *Journal of Nervous & Mental Disease*. 2006;194(1):27-33. doi:10.1097/01.nmd.0000195312.81334.81

127. Sørensen HJ, Nielsen PR, Pedersen CB, Benros ME, Nordentoft M, Mortensen PB. Population impact of familial and environmental risk factors for schizophrenia: A nationwide study. *Schizophrenia Research*. 2014;153(1-3):214-219. doi:10.1016/j.schres.2014.01.008
128. Adriaanse M, van Domburgh L, Hoek HW, Susser E, Doreleijers TAH, Veling W. Prevalence, impact and cultural context of psychotic experiences among ethnic minority youth. *Psychol Med*. 2015;45(3):637-646. doi:10.1017/S0033291714001779
129. Castle D, Wessely S, Der G, Murray RM. The Incidence of Operationally Defined Schizophrenia in Camberwell, 1965–84. *Br J Psychiatry*. 1991;159(6):790-794. doi:10.1192/bjp.159.6.790
130. Coid JW, Kirkbride JB, Barker D, et al. Raised incidence rates of all psychoses among migrant groups: findings from the East London first episode psychosis study. *Arch Gen Psychiatry*. 2008;65(11):1250-1258. doi:10.1001/archpsyc.65.11.1250
131. Fearon P, Kirkbride JB, Morgan C, et al. Incidence of schizophrenia and other psychoses in ethnic minority groups: results from the MRC AESOP Study. *Psychol Med*. 2006;36(11):1541-1550. doi:10.1017/S0033291706008774
132. Kirkbride JB, Barker D, Cowden F, et al. Psychoses, ethnicity and socio-economic status. *Br J Psychiatry*. 2008;193(1):18-24. doi:10.1192/bjp.bp.107.041566
133. Kirkbride JB, Hameed Y, Ankireddypalli G, et al. The Epidemiology of First-Episode Psychosis in Early Intervention in Psychosis Services: Findings From the Social Epidemiology of Psychoses in East Anglia [SEPEA] Study. *AJP*. 2017;174(2):143-153. doi:10.1176/appi.ajp.2016.16010103
134. Reeves SJ, Sauer J, Stewart R, Granger A, Howard RJ. Increased first-contact rates for very-late-onset schizophrenia-like psychosis in African— and Caribbean-born elders. *Br J Psychiatry*. 2001;179(2):172-174. doi:10.1192/bjp.179.2.172
135. Vanheusden K, Mulder CL, van der Ende J, et al. Associations between ethnicity and self-reported hallucinations in a population sample of young adults in The Netherlands. *Psychol Med*. 2008;38(8):1095-1102. doi:10.1017/S0033291707002401
136. Goater N, King M, Cole E, et al. Ethnicity and outcome of psychosis. *Br J Psychiatry*. 1999;175(1):34-42. doi:10.1192/bjp.175.1.34
137. Selten JP, Veen N, Feller W, et al. Incidence of psychotic disorders in immigrant groups to the Netherlands. *Br J Psychiatry*. 2001;178(4):367-372. doi:10.1192/bjp.178.4.367
138. Zolkowska K, Cantor-Graae E, McNEIL TF. Increased rates of psychosis among immigrants to Sweden: is migration a risk factor for psychosis? *Psychol Med*. 2001;31(4):669-678. doi:10.1017/S0033291701003786
139. Ivory V, Witten K, Salmond C, Lin EY, You RQ, Blakely T. The New Zealand Index of Neighbourhood Social Fragmentation: Integrating Theory and Data. *Environ Plan A*. 2012;44(4):972-988. doi:10.1068/a44303

140. Greifenhagen A, Fichter M. Mental illness in homeless women: an epidemiological study in Munich, Germany. *Eur Arch Psychiatry Clin Neurosci*. 1997;247(3):162-172. doi:10.1007/BF03033070
141. Kovess V, Mangin Lazarus C. The prevalence of psychiatric disorders and use of care by homeless people in Paris. *Social Psychiatry and Psychiatric Epidemiology*. 1999;34(11):580-587. doi:10.1007/s001270050178
142. Muñoz M, Vázquez C, Koegel P, Sanz J, Burnam MA. Differential patterns of mental disorders among the homeless in Madrid (Spain) and Los Angeles (USA). *Social Psychiatry and Psychiatric Epidemiology*. 1998;33(10):514-520. doi:10.1007/s001270050088
143. Teasdale SB, Müller-Stierlin AS, Ruusunen A, Eaton M, Marx W, Firth J. Prevalence of food insecurity in people with major depression, bipolar disorder, and schizophrenia and related psychoses: A systematic review and meta-analysis. *Critical Reviews in Food Science and Nutrition*. Published online November 16, 2021:1-18. doi:10.1080/10408398.2021.2002806
144. Shim RS, Compton MT. The Social Determinants of Mental Health: Psychiatrists' Roles in Addressing Discrimination and Food Insecurity. *FOC*. 2020;18(1):25-30. doi:10.1176/appi.focus.20190035
145. Carlson SJ, Andrews MS, Bickel GW. Measuring food insecurity and hunger in the United States: development of a national benchmark measure and prevalence estimates. *J Nutr*. 1999;129(2S Suppl):510S-516S. doi:10.1093/jn/129.2.510S
146. Gundersen C, Ziliak JP. Food Insecurity And Health Outcomes. *Health Affairs*. 2015;34(11):1830-1839. doi:10.1377/hlthaff.2015.0645
147. Brooks JM, Petersen CL, Titus AJ, et al. Varying Levels of Food Insecurity Associated with Clinically Relevant Depressive Symptoms in U.S. Adults Aged 60 Years and Over: Results from the 2005–2014 National Health and Nutrition Survey. *Journal of Nutrition in Gerontology and Geriatrics*. 2019;38(3):218-230. doi:10.1080/21551197.2019.1611520
148. Brostow DP, Gunzburger E, Abbate LM, Brenner LA, Thomas KS. Mental Illness, Not Obesity Status, is Associated with Food Insecurity Among the Elderly in the Health and Retirement Study. *Journal of Nutrition in Gerontology and Geriatrics*. 2019;38(2):149-172. doi:10.1080/21551197.2019.1565901
149. Fitzpatrick KM, Harris C, Drawve G. Living in the midst of fear: Depressive symptomatology among US adults during the COVID-19 pandemic. *Depress Anxiety*. 2020;37(10):957-964. doi:10.1002/da.23080
150. Goldberg SL, Mawn BE. Predictors of Food Insecurity among Older Adults in the United States. *Public Health Nurs*. 2015;32(5):397-407. doi:10.1111/phn.12173
151. Kaufman R, Mirsky J, Witztum E, Grisaru N. Food insecurity among psychiatric patients and welfare clients in Israel. *Isr J Psychiatry Relat Sci*. 2013;50(3):188-192.
152. Grisaru N, Kaufman R, Mirsky J, Witztum E. Food insecurity and mental health: a pilot study of patients in a psychiatric emergency unit in Israel. *Community Ment Health J*. 2011;47(5):513-519. doi:10.1007/s10597-010-9339-8



153. Leung CW, Epel ES, Ritchie LD, Crawford PB, Laraia BA. Food insecurity is inversely associated with diet quality of lower-income adults. *J Acad Nutr Diet*. 2014;114(12):1943-1953.e2. doi:10.1016/j.jand.2014.06.353
154. Loh IH, Oddo VM, Otten J. Food Insecurity Is Associated with Depression among a Vulnerable Workforce: Early Care and Education Workers. *Int J Environ Res Public Health*. 2020;18(1):E170. doi:10.3390/ijerph18010170
155. Martin K, Woo J, Timmins V, et al. Binge eating and emotional eating behaviors among adolescents and young adults with bipolar disorder. *J Affect Disord*. 2016;195:88-95. doi:10.1016/j.jad.2016.02.030
156. Melchior M, Caspi A, Howard LM, et al. Mental Health Context of Food Insecurity: a Representative Cohort of Families With Young Children. *Pediatrics*. 2009;124(4):e564-e572. doi:10.1542/peds.2009-0583
157. Men F, Elgar FJ, Tarasuk V. Food insecurity is associated with mental health problems among Canadian youth. *J Epidemiol Community Health*. 2021;75(8):741-748. doi:10.1136/jech-2020-216149
158. Payab M, Motlagh ARD, Eshraghian M, Rostami R, Siassi F. The association of family food security and depression in mothers having primary school children in Ray-Iran. *J Diabetes Metab Disord*. 2014;13:65. doi:10.1186/2251-6581-13-65
159. Reeder N, Tapanee P, Persell A, Tolar-Peterson T. Food Insecurity, Depression, and Race: Correlations Observed Among College Students at a University in the Southeastern United States. *Int J Environ Res Public Health*. 2020;17(21):E8268. doi:10.3390/ijerph17218268
160. Wang EA, McGinnis KA, Goulet J, et al. Food Insecurity and Health: Data from the Veterans Aging Cohort Study. *Public Health Rep*. 2015;130(3):261-268.
161. Beydoun MA, Wang Y. Pathways linking socioeconomic status to obesity through depression and lifestyle factors among young US adults. *Journal of Affective Disorders*. Published online 2010:12.
162. Mugisha J, Muyinda H, Malamba S, Kinyanda E. Major depressive disorder seven years after the conflict in northern Uganda: burden, risk factors and impact on outcomes (The Wayo-Nero Study). *BMC Psychiatry*. 2015;15:48. doi:10.1186/s12888-015-0423-z
163. Shiue I. People with diabetes, respiratory, liver or mental disorders, higher urinary antimony, bisphenol A, or pesticides had higher food insecurity: USA NHANES, 2005-2006. *Environ Sci Pollut Res Int*. 2016;23(1):198-205. doi:10.1007/s11356-015-5677-y
164. Sorsdahl K, Slopen N, Siefert K, Seedat S, Stein DJ, Williams DR. Household food insufficiency and mental health in South Africa. *J Epidemiol Community Health*. 2011;65(5):426-431. doi:10.1136/jech.2009.091462
165. Alaimo K, Olson CM, Frongillo EA. Family Food Insufficiency, but Not Low Family Income, Is Positively Associated with Dysthymia and Suicide Symptoms in Adolescents. *The Journal of Nutrition*. 2002;132(4):719-725. doi:10.1093/jn/132.4.719

166. Mucheru D, Hanlon MC, Campbell LE, McEvoy M, MacDonald-Wicks L. Social Dysfunction and Diet Outcomes in People with Psychosis. *Nutrients*. 2017;9(1):80. doi:10.3390/nu9010080
167. O'Reilly NL, Hager ER, Harrington D, Black MM. Assessment of risk for food insecurity among African American urban households: utilizing cumulative risk indices and latent class analysis to examine accumulation of risk factors. *Transl Behav Med*. 2020;10(6):1322-1329. doi:10.1093/tbm/ibaa027
168. Pak TY, Kim G. Food stamps, food insecurity, and health outcomes among elderly Americans. *Prev Med*. 2020;130:105871. doi:10.1016/j.ypmed.2019.105871
169. Bettigole E, Kovaszny B, Chung M, Farina J, Balkoski V. Hunger and Mental Illness. *Psychiatric Services*. 1997;48(4):543-534. doi:10.1176/ps.48.4.543-b
170. Davison KM, Kaplan BJ. Food insecurity in adults with mood disorders: prevalence estimates and associations with nutritional and psychological health. *Annals of General Psychiatry*. 2015;14(1):21. doi:10.1186/s12991-015-0059-x
171. Tirfessa K, Lund C, Medhin G, et al. Food insecurity and work impairment in people with severe mental disorders in a rural district of Ethiopia: a cross-sectional survey. *Soc Psychiatry Psychiatr Epidemiol*. 2019;54(9):1055-1066. doi:10.1007/s00127-019-01709-7
172. Vozoris NT, Tarasuk VS. Household Food Insufficiency Is Associated with Poorer Health. *The Journal of Nutrition*. 2003;133(1):120-126. doi:10.1093/jn/133.1.120
173. Waitzkin H, Getrich C, Heying S, et al. Promotoras as Mental Health Practitioners in Primary Care: A Multi-Method Study of an Intervention to Address Contextual Sources of Depression. *J Community Health*. 2011;36(2):316-331. doi:10.1007/s10900-010-9313-y
174. Jones AD. Food Insecurity and Mental Health Status: A Global Analysis of 149 Countries. *American Journal of Preventive Medicine*. 2017;53(2):264-273. doi:10.1016/j.amepre.2017.04.008
175. Afulani P, Herman D, Coleman-Jensen A, Harrison GG. Food Insecurity and Health Outcomes Among Older Adults: The Role of Cost-Related Medication Underuse. *Journal of Nutrition in Gerontology and Geriatrics*. 2015;34(3):319-342. doi:10.1080/21551197.2015.1054575
176. Clarke NMA, Grantham-McGregor SM, Powell C. Nutrition and health predictors of school failure in Jamaican children. *Ecology of Food and Nutrition*. 1991;26(1):47-57. doi:10.1080/03670244.1991.9991188
177. Cueto S. Height, weight, and education achievement in rural Peru. *Food Nutr Bull*. 2005;26(2 Suppl 2):S251-260. doi:10.1177/15648265050262S216
178. Lund C, Brooke-Sumner C, Baingana F, et al. Social determinants of mental disorders and the Sustainable Development Goals: a systematic review of reviews. *Lancet Psychiatry*. 2018;5(4):357-369. doi:10.1016/S2215-0366(18)30060-9

179. Stein AD, Behrman JR, DiGirolamo A, et al. Schooling, educational achievement, and cognitive functioning among young Guatemalan adults. *Food Nutr Bull.* 2005;26(2 Suppl 1):S46-54. doi:10.1177/15648265050262S105
180. Walker SP, Wachs TD, Meeks Gardner J, et al. Child development: risk factors for adverse outcomes in developing countries. *The Lancet.* 2007;369(9556):145-157. doi:10.1016/S0140-6736(07)60076-2
181. Trani JF, Bakhshi P, Kuhlberg J, et al. Mental illness, poverty and stigma in India: a case-control study. *BMJ Open.* 2015;5(2):e006355. doi:10.1136/bmjopen-2014-006355
182. Baillargeon J, Black SA, Pulvino J, Dunn K. The Disease Profile of Texas Prison Inmates. *Annals of Epidemiology.* 2000;10(2):74-80. doi:10.1016/S1047-2797(99)00033-2
183. Black DW, Arndt S, Hale N, Rogerson R. Use of the Mini International Neuropsychiatric Interview (MINI) as a Screening Tool in Prisons: Results of a Preliminary Study. *The Journal of the American Academy of Psychiatry and the Law.* 2004;32(2):6.
184. Staton M, Leukefeld C, Webster JM. Substance Use, Health, and Mental Health: Problems and Service Utilization Among Incarcerated Women. *Int J Offender Ther Comp Criminol.* 2003;47(2):224-239. doi:10.1177/0306624X03251120
185. DiCataldo F, Greer A, Profit WE. Screening Prison Inmates for Mental Disorder: An Examination of the Relationship Between Mental Disorder and Prison Adjustment. *Bull Am Acad Psychiatry Law.* 1995;23(4):13.
186. Eyestone LL, Howell RJ. An Epidemiological Study of Attention-Deficit Hyperactivity Disorder and Major Depression in a Male Prison Population. *Bull Am Acad Psychiatry Law.* 1994;22(2):13.
